# Supplementary figures and images for: Large scale screening for benzimidazole resistance mutations in Nematodirus battus, using both pyrosequence genotyping and deep amplicon sequencing, indicates the early emergence of resistance on UK sheep farms
Source: PubMed Central journal article supplement — Int J Parasitol Drugs Drug Resist. 2020 Mar 6;12:68–76. doi: 10.1016/j.ijpddr.2020.03.001 (PMC7132121; doi:10.1016/j.ijpddr.2020.03.001), 2020-03-06

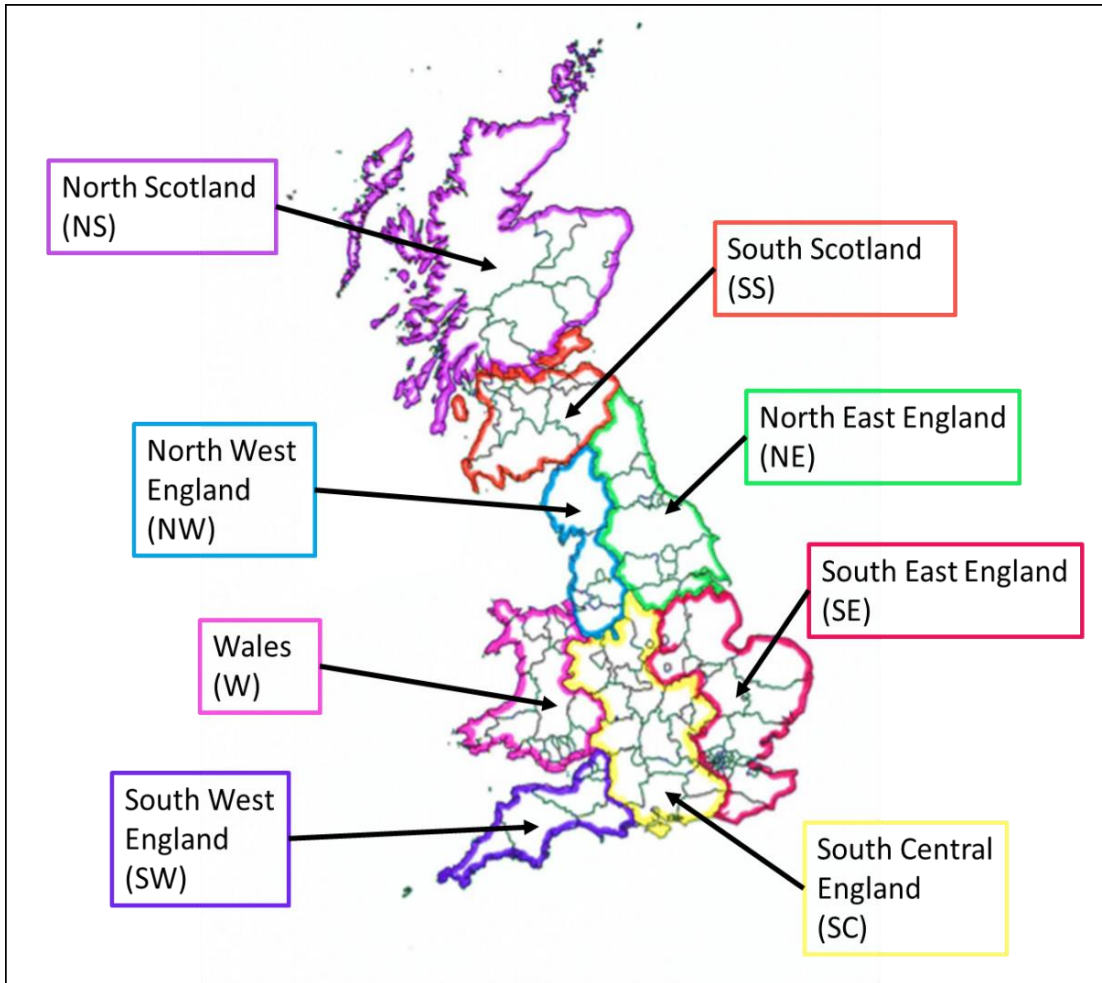

Supplement: mmc2.pdf [file mmc2.pdf]
